# Supplementary material for: Dynamics and Elastic Properties of Glassy Metastable States
Source: MDPI journal article supplement (doi:10.3390/solids2020016), 2021-06-04
Supplement: s1 [file s1]

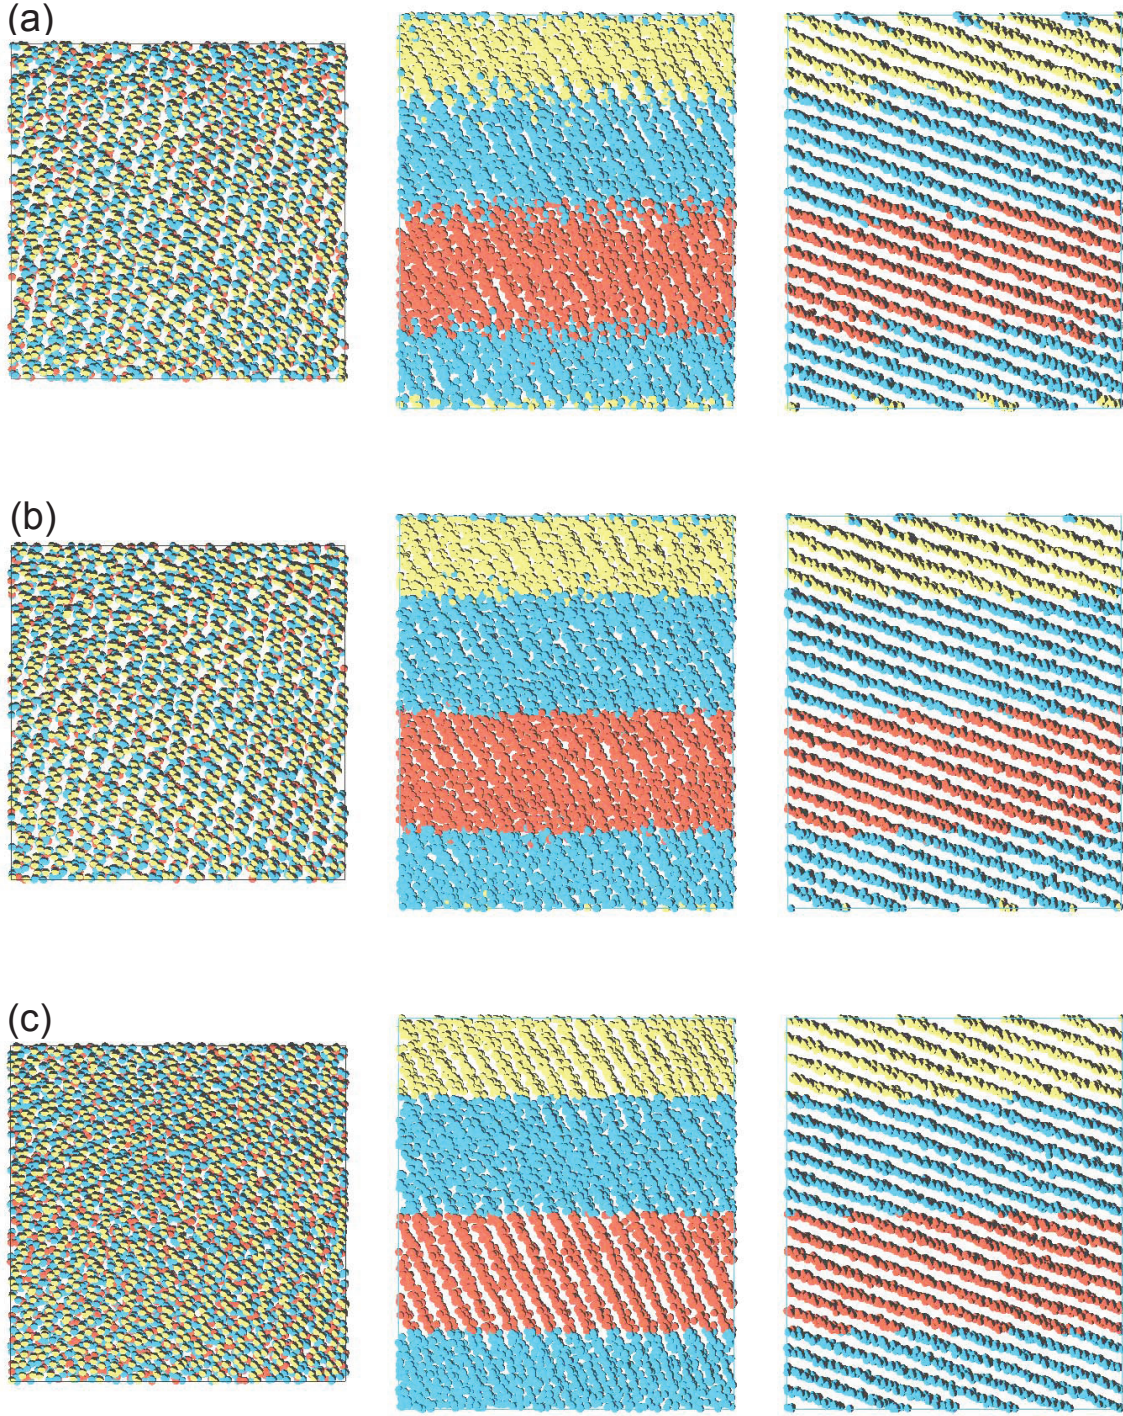

Figure S1: Snapshots of state J at  $T = 102$  viewed on 3 different planes (xy-, xz-, and yz-plane) at (a)  $t = 11100$ , (b)  $t = 32400$ , and (c)  $t = 51000$ , respectively. Colors depend on the z-coordinate at  $t = 51000$  to show where the particles originate in former times. Particles are depicted small to show the position clearly. (a) yz-plane (right) clearly show a landslide (with two layers paired to slide approximately 6 times that of normal direction between the layers) have settled into the final layered positions at (c).
